# Supplementary material
Source: Springer Nature journal article supplement (https://www.springermedizin.de/resource/supplementary/12931_2011_1176_MOESM3_ESM.pdf/9425468)

**A**

Baseline

SFC therapy

Health

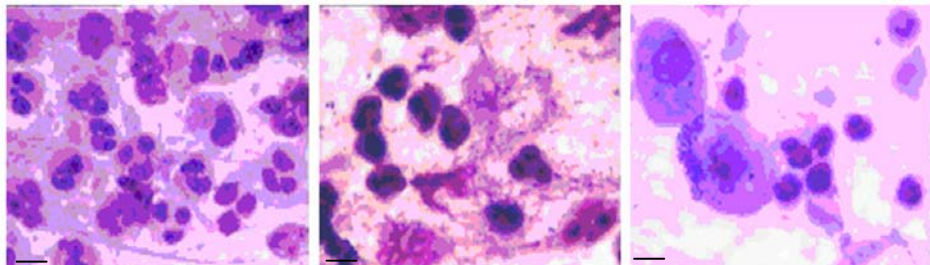**B**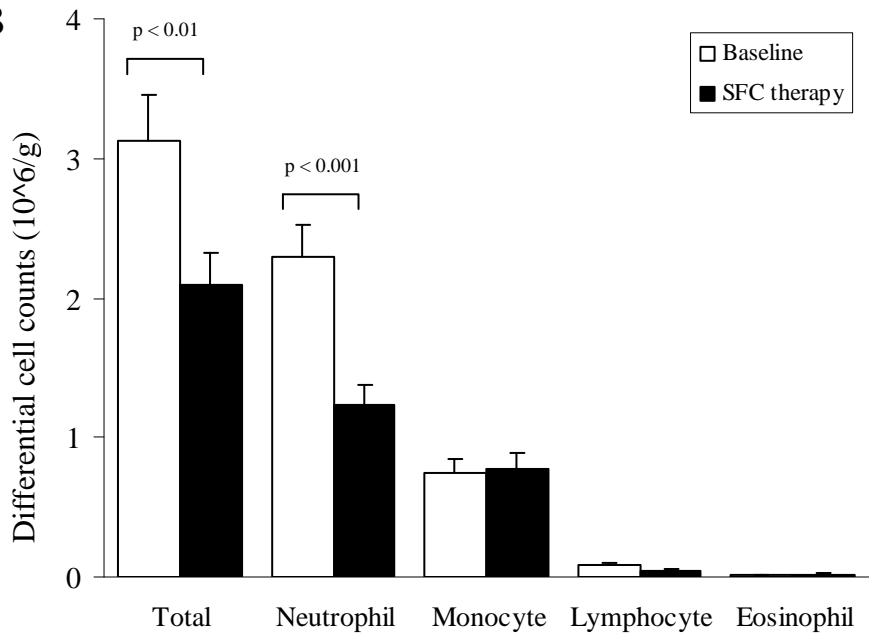

Supplement: MOESM3 [file 9425468]
